# Supplementary material for: Deep Learning for Rapid Identification of Microbes Using Metabolomics Profiles
Source: MDPI journal article supplement (doi:10.3390/metabo11120863), 2021-12-13
Supplement: s1 [file s1]

# Deep Learning for Rapid Identification of Microbes Using Metabolomics Profiles

Danhui Wang, Peyton Greenwood, and Matthias S. Klein\*

Department of Food Science and Technology, The Ohio State University, Columbus, OH, USA

\*Address correspondence to klein.663@osu.edu

## Supplemental Materials

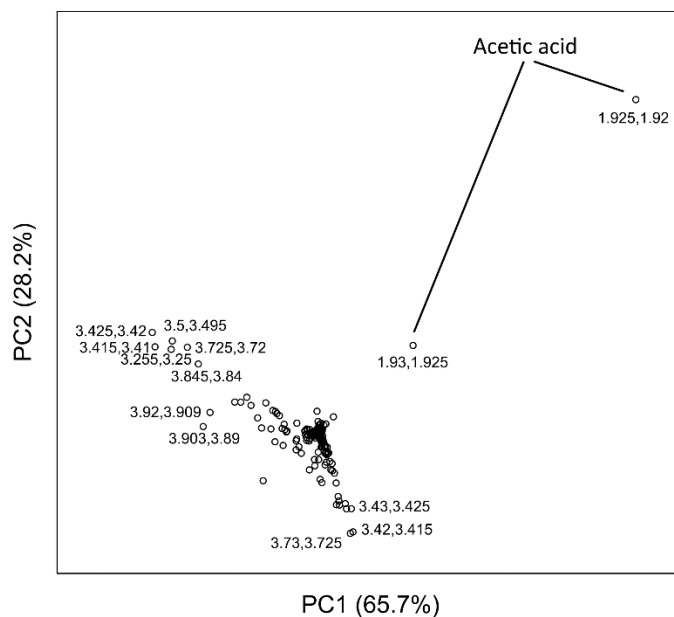

**Figure S1.** Loadings plot of the Principal Component Analysis (PCA). Given are left and right borders of the respective bin [ppm].

**Table S1.** Metabolite identities of signals significantly increasing during microbial growth.

| Metabolite | Chemical shift [ppm] <sup>1</sup>                                                                          |
|------------|------------------------------------------------------------------------------------------------------------|
| 1-propanol | 0.91,0.905; 0.905,0.9; 0.895,0.89; 0.88,0.875                                                              |
| acetate    | 1.95,1.945; 1.945,1.94; 1.94,1.935; 1.935,1.93; 1.93,1.925; 1.925,1.92; 1.92,1.915; 1.915,1.91; 1.91,1.905 |
| ethanol    | 1.2,1.195; 1.195,1.19; 1.19,1.185; 1.185,1.18; 1.18,1.175                                                  |
| formate    | 8.47,8.465; 8.455,8.45; 8.45,8.445                                                                         |
| fumarate   | 6.53,6.525; 6.525,6.52                                                                                     |
| indole     | 7.73,7.725; 7.725,7.72; 7.72,7.715; 7.57,7.565; 7.565,7.56; 7.27,7.265; 7.265,7.26; 7.26,7.255; 7.17,7.165 |
| lactate    | 1.35,1.31                                                                                                  |
| spermidine | 3.06,3.055; 1.78,1.775                                                                                     |
| succinate  | 2.38,2.375                                                                                                 |

<sup>1</sup>Given are left and right borders of the respective bin [ppm]
